# Supplementary material for: Dietary polyunsaturated fatty acids affect longevity, heat tolerance, lipid peroxidation and mitochondrial membrane potential in Daphnia.
Source: Research Square preprint supplement (doi:10.21203/rs.3.rs-2015531/v1), 2022-09-28
Supplement: Supplementary file 1 [file 6abe6a54e819f56e2cea7e27.xlsx]

## Sheet: Explanations_of_columns
Longevity
	Food	Food type: [S]cenedesmus vs. [N]annochloropsis
	HiLow	Food level: H = 200,000 cell/ml/ind/day; L = 20,000 cell/ml/ind/day
	Clone	Clone ID
	attr	attrition in cohort (number of dead or censored)
	censor	censor code: 0 = not censored, i.e., dead; 1 = censored
	age	age at attrition event
Timm	block.run	experimental block ID
	age	age, days
	comparison:Longitudinal	Data points for longitudinal analysis
	comparison:Common_garden	Data points for common garden analysis
	ID	Individual ID
	L,mm	Body length,mm
	Food	Food type: [S]cenedesmus vs. [N]annochloropsis
	HiLow	Food level: H = 200,000 cell/ml/ind/day; L = 20,000 cell/ml/ind/day
	Clone	Clone ID
	Timm	Time until immobilization at 37 oC
	logTimm	natural logarithm of Timm
LPO_PlateReader
	run	run (plate) ID
	ID	individual ID
	Clone	Clone ID
	Food	Food type: [S]cenedesmus vs. [N]annochloropsis
	L, mm	Body length,mm
	WWcalc	Calculated wet weight
	eggs	Number of eggs
	485/528_bg	background fluorescence, excitation 485 nm / emission 528 nm
	530/590_bg	background fluorescence, excitation 530 nm / emission 590 nm
	485/528_60min	Oxidized dye fluorescence, excitation 485 nm / emission 528 nm, after 60 min exposure
	530/590_60min	Reduced dye fluorescence, excitation 530 nm / emission 590 nm, after 60 min exposure
	O/(O+R)60min	Oxidized/Sum
LPO_Miscroscopy
	Age	Individual's age; O = 55-60 days; Y = 20-30 days
	ImageID	Image ID
	Clone	Clone ID
	Food	Food type: [S]cenedesmus vs. [N]annochloropsis
	tissue	tissue RoI (FB=fat body)
	Individual	Individual ID
	Median of green	Median intesity in green channel
	Median of red	Median intesity in red channel
	G/(G+R)_medians	LPO
MitochondrialMembranePotential
	Age	Individual's age; O = 55-60 days; Y = 20-30 days
	Food	Food type: [S]cenedesmus vs. [N]annochloropsis
	Clone	Clone ID
	tissue	tissue RoI (ep=epipodite)
	Label of Rh123_SNexperiment-bg.jmp	Image ID
	Median of Rh123_SNexperiment.jmp	Median intensity in RoI
	Median of bg of Rh123_SNexperiment-bg.jmp	Median intensity in background
	MedianMMP	Background-subtracted MMP

## Sheet: Longevity
Food	HiLow	Clone	attr	censor	age
S	H	FI	0	0	11
S	H	FI	0	0	14
S	H	FI	2	0	17
S	H	FI	3	0	20
S	H	FI	1	0	23
S	H	FI	1	0	26
S	H	FI	3	1	26
S	H	FI	1	0	29
S	H	FI	3	1	29
S	H	FI	1	0	32
S	H	FI	3	1	32
S	H	FI	1	0	36
S	H	FI	0	0	39
S	H	FI	3	0	42
S	H	FI	1	0	45
S	H	FI	1	0	49
S	H	FI	1	0	52
S	H	FI	0	0	56
S	H	FI	2	0	61
S	H	FI	4	0	64
S	H	FI	0	0	68
S	H	FI	0	0	71
S	H	FI	1	0	73
S	H	FI	1	0	77
S	H	FI	2	0	80
S	H	FI	1	0	83
S	H	FI	2	0	85
S	H	FI	1	0	89
S	H	FI	0	0	93
S	H	FI	0	0	98
S	H	FI	2	1	98
S	H	FI	0	0	102
S	H	FI	1	1	102
S	H	FI	0	0	106
S	H	FI	0	0	109
S	H	FI	1	0	112
S	H	FI	4	1	112
S	H	GB	0	0	11
S	H	GB	0	0	14
S	H	GB	1	0	17
S	H	GB	0	0	20
S	H	GB	0	0	23
S	H	GB	2	0	26
S	H	GB	3	1	26
S	H	GB	1	0	29
S	H	GB	3	1	29
S	H	GB	1	0	32
S	H	GB	3	1	32
S	H	GB	1	0	36
S	H	GB	0	0	39
S	H	GB	0	0	42
S	H	GB	0	0	45
S	H	GB	0	0	49
S	H	GB	0	0	52
S	H	GB	0	0	56
S	H	GB	3	0	61
S	H	GB	1	0	64
S	H	GB	0	0	68
S	H	GB	0	0	71
S	H	GB	0	0	73
S	H	GB	0	0	77
S	H	GB	1	0	80
S	H	GB	2	0	83
S	H	GB	0	0	85
S	H	GB	1	0	89
S	H	GB	3	0	93
S	H	GB	1	0	98
S	H	GB	2	1	98
S	H	GB	0	0	102
S	H	GB	5	1	102
S	H	GB	0	0	106
S	H	GB	1	0	109
S	H	GB	1	0	112
S	H	GB	10	1	112
S	H	HU	0	0	11
S	H	HU	0	0	14
S	H	HU	1	0	17
S	H	HU	0	0	20
S	H	HU	1	0	23
S	H	HU	0	0	26
S	H	HU	3	1	26
S	H	HU	1	0	29
S	H	HU	3	1	29
S	H	HU	1	0	32
S	H	HU	3	1	32
S	H	HU	1	0	36
S	H	HU	0	0	39
S	H	HU	0	0	42
S	H	HU	0	0	45
S	H	HU	0	0	49
S	H	HU	1	0	52
S	H	HU	0	0	56
S	H	HU	0	0	61
S	H	HU	2	0	64
S	H	HU	1	0	68
S	H	HU	1	0	71
S	H	HU	0	0	73
S	H	HU	0	0	77
S	H	HU	0	0	80
S	H	HU	2	0	83
S	H	HU	1	0	85
S	H	HU	2	0	89
S	H	HU	1	0	93
S	H	HU	3	0	98
S	H	HU	2	1	98
S	H	HU	3	0	102
S	H	HU	3	1	102
S	H	HU	1	0	106
S	H	HU	4	0	109
S	H	HU	3	0	112
S	H	HU	6	1	112
S	H	IL	2	0	11
S	H	IL	3	0	14
S	H	IL	0	0	17
S	H	IL	2	0	20
S	H	IL	2	0	23
S	H	IL	0	0	26
S	H	IL	3	1	26
S	H	IL	0	0	29
S	H	IL	3	1	29
S	H	IL	0	0	32
S	H	IL	3	1	32
S	H	IL	0	0	36
S	H	IL	0	0	39
S	H	IL	0	0	42
S	H	IL	1	0	45
S	H	IL	4	0	49
S	H	IL	1	0	52
S	H	IL	2	0	56
S	H	IL	1	0	61
S	H	IL	1	0	64
S	H	IL	2	0	68
S	H	IL	1	0	71
S	H	IL	1	0	73
S	H	IL	3	0	77
S	H	IL	0	0	80
S	H	IL	1	0	83
S	H	IL	0	0	85
S	H	IL	7	0	89
S	H	IL	1	0	93
S	H	IL	2	0	98
S	H	IL	0	1	98
S	H	IL	1	0	102
S	H	IL	0	1	102
S	H	IL	0	0	106
S	H	IL	0	0	109
S	H	IL	0	0	112
S	H	IL	0	1	112
S	L	FI	0	0	11
S	L	FI	9	0	14
S	L	FI	0	0	17
S	L	FI	4	0	20
S	L	FI	4	0	23
S	L	FI	5	0	26
S	L	FI	3	1	26
S	L	FI	0	0	29
S	L	FI	3	1	29
S	L	FI	0	0	32
S	L	FI	3	1	32
S	L	FI	0	0	36
S	L	FI	0	0	39
S	L	FI	0	0	42
S	L	FI	2	0	45
S	L	FI	2	0	49
S	L	FI	0	0	52
S	L	FI	0	0	56
S	L	FI	1	0	61
S	L	FI	0	0	64
S	L	FI	2	0	68
S	L	FI	0	0	71
S	L	FI	0	0	73
S	L	FI	0	0	77
S	L	FI	0	0	80
S	L	FI	2	0	83
S	L	FI	0	0	85
S	L	FI	0	0	89
S	L	FI	0	0	93
S	L	FI	4	0	98
S	L	FI	1	1	98
S	L	FI	0	0	102
S	L	FI	2	1	102
S	L	FI	0	0	106
S	L	FI	0	0	109
S	L	FI	0	0	112
S	L	FI	1	1	112
S	L	GB	0	0	11
S	L	GB	0	0	14
S	L	GB	0	0	17
S	L	GB	4	0	20
S	L	GB	5	0	23
S	L	GB	0	0	26
S	L	GB	3	1	26
S	L	GB	1	0	29
S	L	GB	3	1	29
S	L	GB	1	0	32
S	L	GB	3	1	32
S	L	GB	1	0	36
S	L	GB	1	0	39
S	L	GB	0	0	42
S	L	GB	2	0	45
S	L	GB	2	0	49
S	L	GB	0	0	52
S	L	GB	6	0	56
S	L	GB	4	0	61
S	L	GB	2	0	64
S	L	GB	0	0	68
S	L	GB	0	0	71
S	L	GB	0	0	73
S	L	GB	0	0	77
S	L	GB	0	0	80
S	L	GB	0	0	83
S	L	GB	0	0	85
S	L	GB	0	0	89
S	L	GB	0	0	93
S	L	GB	1	0	98
S	L	GB	1	1	98
S	L	GB	0	0	102
S	L	GB	4	1	102
S	L	GB	1	0	106
S	L	GB	1	0	109
S	L	GB	1	0	112
S	L	GB	3	1	112
S	L	HU	0	0	11
S	L	HU	0	0	14
S	L	HU	1	0	17
S	L	HU	4	0	20
S	L	HU	4	0	23
S	L	HU	4	0	26
S	L	HU	3	1	26
S	L	HU	1	0	29
S	L	HU	3	1	29
S	L	HU	1	0	32
S	L	HU	3	1	32
S	L	HU	1	0	36
S	L	HU	0	0	39
S	L	HU	0	0	42
S	L	HU	2	0	45
S	L	HU	3	0	49
S	L	HU	0	0	52
S	L	HU	1	0	56
S	L	HU	1	0	61
S	L	HU	1	0	64
S	L	HU	1	0	68
S	L	HU	0	0	71
S	L	HU	0	0	73
S	L	HU	1	0	77
S	L	HU	1	0	80
S	L	HU	0	0	83
S	L	HU	0	0	85
S	L	HU	1	0	89
S	L	HU	0	0	93
S	L	HU	7	0	98
S	L	HU	1	1	98
S	L	HU	2	0	102
S	L	HU	3	1	102
S	L	HU	4	0	106
S	L	HU	3	0	109
S	L	HU	2	0	112
S	L	HU	1	1	112
S	L	IL	0	0	11
S	L	IL	0	0	14
S	L	IL	2	0	17
S	L	IL	4	0	20
S	L	IL	1	0	23
S	L	IL	0	0	26
S	L	IL	3	1	26
S	L	IL	1	0	29
S	L	IL	3	1	29
S	L	IL	1	0	32
S	L	IL	3	1	32
S	L	IL	1	0	36
S	L	IL	8	0	39
S	L	IL	0	0	42
S	L	IL	10	0	45
S	L	IL	4	0	49
S	L	IL	0	0	52
S	L	IL	1	0	56
S	L	IL	1	0	61
S	L	IL	2	0	64
S	L	IL	0	0	68
S	L	IL	2	0	71
S	L	IL	0	0	73
S	L	IL	1	0	77
S	L	IL	0	0	80
S	L	IL	0	0	83
S	L	IL	6	0	85
S	L	IL	0	0	89
S	L	IL	0	0	93
S	L	IL	1	0	98
S	L	IL	2	1	98
S	L	IL	2	0	102
S	L	IL	1	1	102
S	L	IL	0	0	106
S	L	IL	0	0	109
S	L	IL	0	0	112
S	L	IL	0	1	112
N	H	FI	1	0	11
N	H	FI	1	0	14
N	H	FI	4	0	17
N	H	FI	1	0	20
N	H	FI	0	0	23
N	H	FI	0	0	26
N	H	FI	3	1	26
N	H	FI	1	0	29
N	H	FI	3	1	29
N	H	FI	1	0	32
N	H	FI	3	1	32
N	H	FI	1	0	36
N	H	FI	1	0	39
N	H	FI	1	0	42
N	H	FI	0	0	45
N	H	FI	1	0	49
N	H	FI	0	0	52
N	H	FI	2	0	56
N	H	FI	1	0	61
N	H	FI	0	0	64
N	H	FI	1	0	68
N	H	FI	1	0	71
N	H	FI	0	0	73
N	H	FI	1	0	77
N	H	FI	0	0	80
N	H	FI	3	0	83
N	H	FI	1	0	85
N	H	FI	3	0	89
N	H	FI	3	0	93
N	H	FI	6	0	98
N	H	FI	2	1	98
N	H	FI	2	0	102
N	H	FI	3	1	102
N	H	FI	2	0	106
N	H	FI	0	0	109
N	H	FI	2	0	112
N	H	FI	3	1	112
N	H	GB	1	0	11
N	H	GB	0	0	14
N	H	GB	4	0	17
N	H	GB	0	0	20
N	H	GB	3	0	23
N	H	GB	1	0	26
N	H	GB	3	1	26
N	H	GB	0	0	29
N	H	GB	3	1	29
N	H	GB	0	0	32
N	H	GB	3	1	32
N	H	GB	0	0	36
N	H	GB	2	0	39
N	H	GB	1	0	42
N	H	GB	2	0	45
N	H	GB	0	0	49
N	H	GB	0	0	52
N	H	GB	0	0	56
N	H	GB	0	0	61
N	H	GB	0	0	64
N	H	GB	0	0	68
N	H	GB	1	0	71
N	H	GB	1	0	73
N	H	GB	0	0	77
N	H	GB	0	0	80
N	H	GB	0	0	83
N	H	GB	3	0	85
N	H	GB	3	0	89
N	H	GB	0	0	93
N	H	GB	9	0	98
N	H	GB	2	1	98
N	H	GB	4	0	102
N	H	GB	3	1	102
N	H	GB	0	0	106
N	H	GB	0	0	109
N	H	GB	1	0	112
N	H	GB	0	1	112
N	H	HU	0	0	11
N	H	HU	0	0	14
N	H	HU	3	0	17
N	H	HU	0	0	20
N	H	HU	3	0	23
N	H	HU	0	0	26
N	H	HU	3	1	26
N	H	HU	0	0	29
N	H	HU	3	1	29
N	H	HU	0	0	32
N	H	HU	3	1	32
N	H	HU	0	0	36
N	H	HU	1	0	39
N	H	HU	1	0	42
N	H	HU	3	0	45
N	H	HU	0	0	49
N	H	HU	0	0	52
N	H	HU	1	0	56
N	H	HU	0	0	61
N	H	HU	0	0	64
N	H	HU	2	0	68
N	H	HU	0	0	71
N	H	HU	0	0	73
N	H	HU	3	0	77
N	H	HU	2	0	80
N	H	HU	1	0	83
N	H	HU	1	0	85
N	H	HU	3	0	89
N	H	HU	1	0	93
N	H	HU	5	0	98
N	H	HU	2	1	98
N	H	HU	5	0	102
N	H	HU	1	1	102
N	H	HU	1	0	106
N	H	HU	2	0	109
N	H	HU	6	0	112
N	H	HU	0	1	112
N	H	IL	0	0	11
N	H	IL	5	0	14
N	H	IL	2	0	17
N	H	IL	0	0	20
N	H	IL	1	0	23
N	H	IL	0	0	26
N	H	IL	3	1	26
N	H	IL	0	0	29
N	H	IL	3	1	29
N	H	IL	0	0	32
N	H	IL	3	1	32
N	H	IL	0	0	36
N	H	IL	0	0	39
N	H	IL	0	0	42
N	H	IL	0	0	45
N	H	IL	0	0	49
N	H	IL	1	0	52
N	H	IL	1	0	56
N	H	IL	0	0	61
N	H	IL	0	0	64
N	H	IL	2	0	68
N	H	IL	1	0	71
N	H	IL	1	0	73
N	H	IL	4	0	77
N	H	IL	2	0	80
N	H	IL	1	0	83
N	H	IL	1	0	85
N	H	IL	0	0	89
N	H	IL	4	0	93
N	H	IL	3	0	98
N	H	IL	2	1	98
N	H	IL	1	0	102
N	H	IL	4	1	102
N	H	IL	1	0	106
N	H	IL	2	0	109
N	H	IL	0	0	112
N	H	IL	6	1	112
N	L	FI	0	0	11
N	L	FI	2	0	14
N	L	FI	0	0	17
N	L	FI	1	0	20
N	L	FI	4	0	23
N	L	FI	0	0	26
N	L	FI	3	1	26
N	L	FI	2	0	29
N	L	FI	3	1	29
N	L	FI	2	0	32
N	L	FI	3	1	32
N	L	FI	2	0	36
N	L	FI	0	0	39
N	L	FI	1	0	42
N	L	FI	4	0	45
N	L	FI	5	0	49
N	L	FI	6	0	52
N	L	FI	3	0	56
N	L	FI	6	0	61
N	L	FI	1	0	64
N	L	FI	0	0	68
N	L	FI	1	0	71
N	L	FI	0	0	73
N	L	FI	0	0	77
N	L	FI	0	0	80
N	L	FI	0	0	83
N	L	FI	0	0	85
N	L	FI	1	0	89
N	L	FI	0	0	93
N	L	FI	0	0	98
N	L	FI	1	1	98
N	L	FI	0	0	102
N	L	FI	0	1	102
N	L	FI	0	0	106
N	L	FI	0	0	109
N	L	FI	0	0	112
N	L	FI	0	1	112
N	L	GB	0	0	11
N	L	GB	1	0	14
N	L	GB	2	0	17
N	L	GB	0	0	20
N	L	GB	1	0	23
N	L	GB	0	0	26
N	L	GB	3	1	26
N	L	GB	1	0	29
N	L	GB	3	1	29
N	L	GB	1	0	32
N	L	GB	3	1	32
N	L	GB	1	0	36
N	L	GB	0	0	39
N	L	GB	2	0	42
N	L	GB	0	0	45
N	L	GB	6	0	49
N	L	GB	5	0	52
N	L	GB	2	0	56
N	L	GB	8	0	61
N	L	GB	2	0	64
N	L	GB	1	0	68
N	L	GB	0	0	71
N	L	GB	0	0	73
N	L	GB	0	0	77
N	L	GB	0	0	80
N	L	GB	1	0	83
N	L	GB	0	0	85
N	L	GB	1	0	89
N	L	GB	0	0	93
N	L	GB	1	0	98
N	L	GB	1	1	98
N	L	GB	0	0	102
N	L	GB	1	1	102
N	L	GB	0	0	106
N	L	GB	0	0	109
N	L	GB	0	0	112
N	L	GB	0	1	112
N	L	HU	0	0	11
N	L	HU	0	0	14
N	L	HU	1	0	17
N	L	HU	0	0	20
N	L	HU	0	0	23
N	L	HU	0	0	26
N	L	HU	3	1	26
N	L	HU	0	0	29
N	L	HU	3	1	29
N	L	HU	0	0	32
N	L	HU	3	1	32
N	L	HU	0	0	36
N	L	HU	0	0	39
N	L	HU	0	0	42
N	L	HU	5	0	45
N	L	HU	3	0	49
N	L	HU	5	0	52
N	L	HU	5	0	56
N	L	HU	6	0	61
N	L	HU	2	0	64
N	L	HU	2	0	68
N	L	HU	2	0	71
N	L	HU	1	0	73
N	L	HU	0	0	77
N	L	HU	0	0	80
N	L	HU	0	0	83
N	L	HU	0	0	85
N	L	HU	2	0	89
N	L	HU	1	0	93
N	L	HU	1	0	98
N	L	HU	1	1	98
N	L	HU	0	0	102
N	L	HU	1	1	102
N	L	HU	0	0	106
N	L	HU	0	0	109
N	L	HU	0	0	112
N	L	HU	0	1	112
N	L	IL	0	0	11
N	L	IL	0	0	14
N	L	IL	0	0	17
N	L	IL	5	0	20
N	L	IL	2	0	23
N	L	IL	0	0	26
N	L	IL	3	1	26
N	L	IL	0	0	29
N	L	IL	3	1	29
N	L	IL	0	0	32
N	L	IL	3	1	32
N	L	IL	0	0	36
N	L	IL	0	0	39
N	L	IL	2	0	42
N	L	IL	1	0	45
N	L	IL	12	0	49
N	L	IL	5	0	52
N	L	IL	1	0	56
N	L	IL	0	0	61
N	L	IL	1	0	64
N	L	IL	0	0	68
N	L	IL	0	0	71
N	L	IL	0	0	73
N	L	IL	0	0	77
N	L	IL	1	0	80
N	L	IL	0	0	83
N	L	IL	0	0	85
N	L	IL	0	0	89
N	L	IL	0	0	93
N	L	IL	0	0	98
N	L	IL	1	1	98
N	L	IL	0	0	102
N	L	IL	1	1	102
N	L	IL	0	0	106
N	L	IL	0	0	109
N	L	IL	0	0	112
N	L	IL	0	1	112

## Sheet: Timm
block.run	age	comparison:Longitudinal	comparison:Common_garden	ID	L,mm	Food	HiLow	Clone	Timm	logTimm
1.1	30	longitudinal	ignore	1	2.74286	S	H	FI	52	3.95124
1.1	30	longitudinal	ignore	2	2.57143	S	L	FI	52	3.95124
1.1	30	longitudinal	ignore	3	3.05714	N	H	FI	98	4.58497
1.1	30	longitudinal	ignore	4	2.65714	N	L	FI	98	4.58497
1.1	30	longitudinal	ignore	5	2.77143	S	H	GB	43	3.7612
1.1	30	longitudinal	ignore	6	2.34286	S	L	GB	60	4.09434
1.1	30	longitudinal	ignore	7	2.74286	N	H	GB	44	3.78419
1.1	30	longitudinal	ignore	8	2.05714	N	L	GB	51	3.93183
1.1	30	longitudinal	ignore	9	2.91429	S	H	HU	45	3.80666
1.1	30	longitudinal	ignore	10	2.34286	S	L	HU	61	4.11087
1.1	30	longitudinal	ignore	11	2.91429	N	H	HU	46	3.82864
1.1	30	longitudinal	ignore	12	2.11429	N	L	HU	48	3.8712
1.1	30	longitudinal	ignore	13	3.08571	S	H	IL	88	4.47734
1.1	30	longitudinal	ignore	14	2.45714	S	L	IL	99	4.59512
1.1	30	longitudinal	ignore	15	3	N	H	IL	86	4.45435
1.1	30	longitudinal	ignore	16	2.34286	N	L	IL	86	4.45435
1.1	30	longitudinal	ignore	17	3.05714	S	H	FI	87	4.46591
1.1	30	longitudinal	ignore	18	2.62857	S	L	FI	102	4.62497
1.1	30	longitudinal	ignore	19	2.71429	N	H	FI	33	3.49651
1.1	30	longitudinal	ignore	20	2.22857	N	L	FI	103	4.63473
1.1	30	longitudinal	ignore	21	2.88571	S	H	GB	54	3.98898
1.1	30	longitudinal	ignore	22	2.51429	S	L	GB	55	4.00733
1.1	30	longitudinal	ignore	23	2.62857	N	H	GB	55	4.00733
1.1	30	longitudinal	ignore	24	2.22857	N	L	GB	56	4.02535
1.1	30	longitudinal	ignore	25	2.74286	S	H	HU	48	3.8712
1.1	30	longitudinal	ignore	26	2.34286	S	L	HU	49	3.89182
1.1	30	longitudinal	ignore	27	2.71429	N	H	HU	50	3.91202
1.1	30	longitudinal	ignore	28	2.02857	N	L	HU	72	4.27667
1.1	30	longitudinal	ignore	29	3.17143	S	H	IL	61	4.11087
1.1	30	longitudinal	ignore	30	2.34286	S	L	IL	45	3.80666
1.1	30	longitudinal	ignore	31	2.6	N	H	IL	38	3.63759
1.1	30	longitudinal	ignore	32	2.37143	N	L	IL	101	4.61512
1.1	30	longitudinal	ignore	33	3.25714	S	H	FI	73	4.29046
1.1	30	longitudinal	ignore	34	2.34286	S	L	FI	50	3.91202
1.1	30	longitudinal	ignore	35	2.74286	N	H	FI	39	3.66356
1.1	30	longitudinal	ignore	36	2.2	N	L	FI	39	3.66356
1.1	30	longitudinal	ignore	37	2.94286	S	H	GB	58	4.06044
1.1	30	longitudinal	ignore	38	2.31429	S	L	GB	58	4.06044
1.1	30	longitudinal	ignore	39	2.82857	N	H	GB	59	4.07754
1.1	30	longitudinal	ignore	40	2.14286	N	L	GB	41	3.71357
1.1	30	longitudinal	ignore	41	2.74286	S	H	HU	41	3.71357
1.1	30	longitudinal	ignore	42	2.42857	S	L	HU	48	3.8712
1.1	30	longitudinal	ignore	43	2.8	N	H	HU	52	3.95124
1.1	30	longitudinal	ignore	44	2.14286	N	L	HU	51	3.93183
1.1	30	longitudinal	ignore	45	3.4	S	H	IL	85	4.44265
1.1	30	longitudinal	ignore	46	2.65714	S	L	IL	99	4.59512
1.1	30	longitudinal	ignore	47	3.14286	N	H	IL	111	4.70953
1.1	30	longitudinal	ignore	48	2.22857	N	L	IL	112	4.7185
1.2	30	longitudinal	ignore	1	2.82857	S	H	FI	47	3.85015
1.2	30	longitudinal	ignore	2	2.51429	S	L	FI	57	4.04305
1.2	30	longitudinal	ignore	3	3.17143	N	H	FI	127	4.84419
1.2	30	longitudinal	ignore	4	1.94286	N	L	FI	60	4.09434
1.2	30	longitudinal	ignore	5	2.88571	S	H	GB	41	3.71357
1.2	30	longitudinal	ignore	6	2.34286	S	L	GB	61	4.11087
1.2	30	longitudinal	ignore	7	2.57143	N	H	GB	52	3.95124
1.2	30	longitudinal	ignore	8	2.11429	N	L	GB	53	3.97029
1.2	30	longitudinal	ignore	9	2.91429	S	H	HU	47	3.85015
1.2	30	longitudinal	ignore	10	2.62857	S	L	HU	53	3.97029
1.2	30	longitudinal	ignore	11	2.68571	N	H	HU	48	3.8712
1.2	30	longitudinal	ignore	12	2.02857	N	L	HU	48	3.8712
1.2	30	longitudinal	ignore	13	2.77143	S	H	IL	42	3.73767
1.2	30	longitudinal	ignore	14	2.74286	S	L	IL	135	4.90527
1.2	30	longitudinal	ignore	15	3.22857	N	H	IL	115	4.74493
1.2	30	longitudinal	ignore	16	2.34286	N	L	IL	130	4.86753
1.2	30	longitudinal	ignore	17	2.74286	S	H	FI	37	3.61092
1.2	30	longitudinal	ignore	18	2.08571	S	L	FI	54	3.98898
1.2	30	longitudinal	ignore	19	3.17143	N	H	FI	94	4.54329
1.2	30	longitudinal	ignore	20	2.6	N	L	FI	135	4.90527
1.2	30	longitudinal	ignore	21	2.94286	S	H	GB	43	3.7612
1.2	30	longitudinal	ignore	22	2.11429	S	L	GB	58	4.06044
1.2	30	longitudinal	ignore	23	2.74286	N	H	GB	37	3.61092
1.2	30	longitudinal	ignore	24	2.11429	N	L	GB	44	3.78419
1.2	30	longitudinal	ignore	25	3.05714	S	H	HU	44	3.78419
1.2	30	longitudinal	ignore	26	2.22857	S	L	HU	44	3.78419
1.2	30	longitudinal	ignore	27	2.62857	N	H	HU	49	3.89182
1.2	30	longitudinal	ignore	28	2.11429	N	L	HU	54	3.98898
1.2	30	longitudinal	ignore	29	3.05714	S	H	IL	75	4.31749
1.2	30	longitudinal	ignore	30	2.42857	S	L	IL	141	4.94876
1.2	30	longitudinal	ignore	31	3.31429	N	H	IL	130	4.86753
1.2	30	longitudinal	ignore	32		N	L	IL	141	4.94876
1.2	30	longitudinal	ignore	33	3	S	H	FI	39	3.66356
1.2	30	longitudinal	ignore	34	2.57143	S	L	FI	132	4.8828
1.2	30	longitudinal	ignore	35	2.62857	N	H	FI	45	3.80666
1.2	30	longitudinal	ignore	36	2.02857	N	L	FI	131	4.8752
1.2	30	longitudinal	ignore	37	2.97143	S	H	GB	55	4.00733
1.2	30	longitudinal	ignore	38	2.28571	S	L	GB	55	4.00733
1.2	30	longitudinal	ignore	39	2.77143	N	H	GB	45	3.80666
1.2	30	longitudinal	ignore	40	2	N	L	GB	63	4.14313
1.2	30	longitudinal	ignore	41	2.85714	S	H	HU	39	3.66356
1.2	30	longitudinal	ignore	42	2.05714	S	L	HU	66	4.18965
1.2	30	longitudinal	ignore	43	2.85714	N	H	HU	56	4.02535
1.2	30	longitudinal	ignore	44	2.34286	N	L	HU	66	4.18965
1.2	30	longitudinal	ignore	45	3.42857	S	H	IL	95	4.55388
1.2	30	longitudinal	ignore	46	2.37143	S	L	IL	135	4.90527
1.2	30	longitudinal	ignore	47	3.05714	N	H	IL	117	4.76217
1.2	30	longitudinal	ignore	48	2.25714	N	L	IL	65	4.17439
1.3	30	longitudinal	ignore	1	2.37143	N	L	IL	26	3.2581
1.3	30	longitudinal	ignore	2	2.97143	N	H	IL	26	3.2581
1.3	30	longitudinal	ignore	3	2.6	S	L	IL	96	4.56435
1.3	30	longitudinal	ignore	4	3	S	H	IL	71	4.26268
1.3	30	longitudinal	ignore	5	2.22857	N	L	HU	40	3.68888
1.3	30	longitudinal	ignore	6	2.8	N	H	HU	48	3.8712
1.3	30	longitudinal	ignore	7	2.31429	S	L	HU	55	4.00733
1.3	30	longitudinal	ignore	8	2.97143	S	H	HU	41	3.71357
1.3	30	longitudinal	ignore	9	2.02857	N	L	GB	50	3.91202
1.3	30	longitudinal	ignore	10	2.85714	N	H	GB	36	3.58352
1.3	30	longitudinal	ignore	11	2.48571	S	L	GB	45	3.80666
1.3	30	longitudinal	ignore	12	2.91429	S	H	GB	30	3.4012
1.3	30	longitudinal	ignore	13	2.2	N	L	FI	53	3.97029
1.3	30	longitudinal	ignore	14	3.31429	N	H	FI	78	4.35671
1.3	30	longitudinal	ignore	15	2.74286	S	L	FI	79	4.36945
1.3	30	longitudinal	ignore	16	3.28571	S	H	FI	28	3.3322
1.3	30	longitudinal	ignore	17	2.28571	N	L	IL	58	4.06044
1.3	30	longitudinal	ignore	18	3.08571	N	H	IL	77	4.34381
1.3	30	longitudinal	ignore	19	2.8	S	L	IL	27	3.29584
1.3	30	longitudinal	ignore	20	3.45714	S	H	IL	59	4.07754
1.3	30	longitudinal	ignore	21	2.14286	N	L	HU	57	4.04305
1.3	30	longitudinal	ignore	22	2.8	N	H	HU	47	3.85015
1.3	30	longitudinal	ignore	23	2.42857	S	L	HU	59	4.07754
1.3	30	longitudinal	ignore	24	2.91429	S	H	HU	42	3.73767
1.3	30	longitudinal	ignore	25	2.2	N	L	GB	57	4.04305
1.3	30	longitudinal	ignore	26	3	N	H	GB	43	3.7612
1.3	30	longitudinal	ignore	27	2.42857	S	L	GB	54	3.98898
1.3	30	longitudinal	ignore	28	3	S	H	GB	37	3.61092
1.3	30	longitudinal	ignore	29	2.34286	N	L	FI	82	4.40672
1.3	30	longitudinal	ignore	30	3.42857	N	H	FI	27	3.29584
1.3	30	longitudinal	ignore	31	2.6	S	L	FI	27	3.29584
1.3	30	longitudinal	ignore	32	2.88571	S	H	FI	47	3.85015
1.3	30	longitudinal	ignore	33	2.45714	N	L	IL	91	4.51086
1.3	30	longitudinal	ignore	34	3.31429	N	H	IL	40	3.68888
1.3	30	longitudinal	ignore	35	2.48571	S	L	IL	90	4.49981
1.3	30	longitudinal	ignore	36	3.31429	S	H	IL	38	3.63759
1.3	30	longitudinal	ignore	37	2.05714	N	L	HU	66	4.18965
1.3	30	longitudinal	ignore	38	2.62857	N	H	HU	50	3.91202
1.3	30	longitudinal	ignore	39	2.34286	S	L	HU	56	4.02535
1.3	30	longitudinal	ignore	40	3	S	H	HU	44	3.78419
1.3	30	longitudinal	ignore	41	2.22857	N	L	GB	69	4.23411
1.3	30	longitudinal	ignore	42	2.94286	N	H	GB	44	3.78419
1.3	30	longitudinal	ignore	43	2.42857	S	L	GB	67	4.20469
1.3	30	longitudinal	ignore	44	3.02857	S	H	GB	45	3.80666
1.3	30	longitudinal	ignore	45	2.08571	N	L	FI	70	4.2485
1.3	30	longitudinal	ignore	46	3.34286	N	H	FI	49	3.89182
1.3	30	longitudinal	ignore	47	2.85714	S	L	FI	29	3.3673
1.3	30	longitudinal	ignore	48	3.28571	S	H	FI	49	3.89182
2.1	20	ignore	common_garden	1	2.65714	S	H	FI	76	4.33073
2.1	20	ignore	common_garden	2	2.57143	N	H	FI	82	4.40672
2.1	90	longitudinal	common_garden	3	3.45714	S	H	FI	44	3.78419
2.1	90	longitudinal	common_garden	4	3.31429	N	H	FI	54	3.98898
2.1	20	ignore	common_garden	5	2.05714	S	L	FI	61	4.11087
2.1	20	ignore	common_garden	6	2.14286	N	L	FI	80	4.38203
2.1	90	longitudinal	common_garden	7	2.85714	S	L	FI	54	3.98898
2.1	90	longitudinal	common_garden	8	3.37143	N	L	FI	79	4.36945
2.1	20	ignore	common_garden	9	2.51429	S	H	GB	37	3.61092
2.1	20	ignore	common_garden	10	2.54286	N	H	GB	49	3.89182
2.1	90	longitudinal	common_garden	11	3.42857	S	H	GB	38	3.63759
2.1	90	longitudinal	common_garden	12	4.28571	N	H	GB	75	4.31749
2.1	20	ignore	common_garden	13	2.17143	S	L	GB	50	3.91202
2.1	20	ignore	common_garden	14	1.8	N	L	GB	45	3.80666
2.1	90	longitudinal	common_garden	15	2.85714	S	L	GB	50	3.91202
2.1	90	longitudinal	common_garden	16	2.82857	N	L	GB	50	3.91202
2.1	20	ignore	common_garden	17	2.51429	S	H	HU	55	4.00733
2.1	20	ignore	common_garden	18	2.48571	N	H	HU	51	3.93183
2.1	90	longitudinal	common_garden	19	3.4	S	H	HU	55	4.00733
2.1	90	longitudinal	common_garden	20	3.25714	N	H	HU	40	3.68888
2.1	20	ignore	common_garden	21	2.31429	S	L	HU	39	3.66356
2.1	20	ignore	common_garden	22	2.14286	N	L	HU	62	4.12713
2.1	90	longitudinal	common_garden	23	3	S	L	HU	55	4.00733
2.1	90	longitudinal	common_garden	24	2.68571	N	L	HU	52	3.95124
2.1	20	ignore	common_garden	25	2.62857	S	H	IL	77	4.34381
2.1	20	ignore	common_garden	26	2.62857	N	H	IL	87	4.46591
2.1	90	longitudinal	common_garden	27	3.42857	S	H	IL	56	4.02535
2.1	90	longitudinal	common_garden	28	3.85714	N	H	IL	86	4.45435
2.1	20	ignore	common_garden	29	2.4	S	L	IL	62	4.12713
2.1	20	ignore	common_garden	30	1.88571	N	L	IL	72	4.27667
2.1	90	longitudinal	common_garden	31	3	S	L	IL	56	4.02535
2.1	90	longitudinal	common_garden	32	2.91429	N	L	IL	101	4.61512
2.1	20	ignore	common_garden	33	2.74286	S	H	FI	75	4.31749
2.1	20	ignore	common_garden	34	2.51429	N	H	FI	64	4.15888
2.1	90	longitudinal	common_garden	35	3.17143	S	L	FI	40	3.68888
2.1	90	longitudinal	common_garden	36	4	N	L	FI	83	4.41884
2.1	20	ignore	common_garden	37	2.48571	S	H	GB	53	3.97029
2.1	20	ignore	common_garden	38	2.6	N	H	GB	41	3.71357
2.1	90	longitudinal	common_garden	39	3.48571	S	L	GB	41	3.71357
2.1	90	longitudinal	common_garden	40	3.42857	N	L	GB	60	4.09434
2.1	20	ignore	common_garden	41	2.54286	S	H	HU	48	3.8712
2.1	20	ignore	common_garden	42	2.48571	N	H	HU	53	3.97029
2.1	90	longitudinal	common_garden	43	3.51429	S	L	HU	43	3.7612
2.1	90	longitudinal	common_garden	44	3.37143	N	L	HU	43	3.7612
2.1	20	ignore	common_garden	45	2.68571	S	H	IL	85	4.44265
2.1	20	ignore	common_garden	46	2.77143	N	H	IL	96	4.56435
2.1	90	longitudinal	common_garden	47	3.08571	S	L	IL	98	4.58497
2.1	90	longitudinal	common_garden	48	4.22857	N	L	IL	78	4.35671
2.2	90	longitudinal	common_garden	1	3.6	S	H	FI	46	3.82864
2.2	90	longitudinal	common_garden	2	3.22857	N	H	FI	59	4.07754
2.2	90	longitudinal	common_garden	3	3.28571	S	L	FI	92	4.52179
2.2	90	longitudinal	common_garden	4	3.05714	S	L	IL	96	4.56435
2.2	20	ignore	common_garden	5	2.85714	S	H	FI	91	4.51086
2.2	20	ignore	common_garden	6	2.74286	N	H	FI	72	4.27667
2.2	20	ignore	common_garden	7	2.02857	S	L	FI	22	3.09104
2.2	20	ignore	common_garden	8	2	N	L	FI	30	3.4012
2.2	90	longitudinal	common_garden	9	3.42857	S	H	GB	39	3.66356
2.2	90	longitudinal	common_garden	10	3.28571	N	H	GB	52	3.95124
2.2	90	longitudinal	common_garden	11	2.65714	S	L	GB	52	3.95124
2.2	90	longitudinal	common_garden	12	2.65714	N	L	GB	40	3.68888
2.2	20	ignore	common_garden	13	2.42857	S	H	GB	47	3.85015
2.2	20	ignore	common_garden	14	2.48571	N	H	GB	41	3.71357
2.2	20	ignore	common_garden	15	1.97143	S	L	GB	23	3.13549
2.2	20	ignore	common_garden	16	1.8	N	L	GB	42	3.73767
2.2	90	longitudinal	common_garden	17	3.37143	S	H	HU	31	3.43399
2.2	90	longitudinal	common_garden	18	3.34286	N	H	HU	32	3.46574
2.2	90	longitudinal	common_garden	19	2.77143	S	L	HU	42	3.73767
2.2	90	longitudinal	common_garden	20	2.6	N	L	HU	47	3.85015
2.2	20	ignore	common_garden	21	2.05714	S	L	HU	33	3.49651
2.2	20	ignore	common_garden	22	1.97143	N	L	HU	60	4.09434
2.2	20	ignore	common_garden	23	2.34286	S	H	HU	52	3.95124
2.2	20	ignore	common_garden	24	2.45714	N	H	HU	43	3.7612
2.2	20	ignore	common_garden	25	2.74286	S	H	IL	81	4.39445
2.2	90	longitudinal	common_garden	26	3.85714	N	H	IL	82	4.40672
2.2	90	longitudinal	common_garden	27	3.2	S	L	IL	83	4.41884
2.2	90	longitudinal	common_garden	28	2.97143	N	L	IL	85	4.44265
2.2	20	ignore	common_garden	29	2.65714	S	H	IL	93	4.5326
2.2	20	ignore	common_garden	30	2.8	N	H	IL	81	4.39445
2.2	20	ignore	common_garden	31	2.34286	S	L	IL	61	4.11087
2.2	20	ignore	common_garden	32	2.2	N	L	IL	43	3.7612
2.2	90	longitudinal	common_garden	33	3.02857	S	L	FI	44	3.78419
2.2	20	ignore	common_garden	34	2.65714	N	H	IL	82	4.40672
2.2	20	ignore	common_garden	35	2.25714	S	L	FI	63	4.14313
2.2	20	ignore	common_garden	36	1.94286	N	L	FI	25	3.21888
2.2	90	longitudinal	common_garden	37	2.77143	S	L	GB	68	4.21951
2.2	90	longitudinal	common_garden	38	3.2	N	H	GB	44	3.78419
2.2	20	ignore	common_garden	39	2.17143	S	L	GB	82	4.40672
2.2	20	ignore	common_garden	40	1.91429	N	L	GB	59	4.07754
2.2	90	longitudinal	common_garden	41	2.71429	S	L	HU	55	4.00733
2.2	90	longitudinal	common_garden	42	3.57143	S	H	GB	36	3.58352
2.2	20	ignore	common_garden	43	2.14286	S	L	HU	59	4.07754
2.2	20	ignore	common_garden	44	1.97143	N	L	HU	72	4.27667
2.2	20	ignore	common_garden	45	2.34286	S	L	IL	27	3.29584
2.2	90	longitudinal	common_garden	46	4	N	H	IL	99	4.59512
2.2	20	ignore	common_garden	47	2.28571	S	L	IL	92	4.52179
2.2	20	ignore	common_garden	48	2.02857	N	L	IL	104	4.64439
2.3	20	ignore	common_garden	1	2.71429	S	H	GB	35	3.55535
2.3	20	ignore	common_garden	2	2.17143	S	L	GB	35	3.55535
2.3	20	ignore	common_garden	3	2.74286	N	H	GB	27	3.29584
2.3	20	ignore	common_garden	4	1.94286	N	L	GB	52	3.95124
2.3	90	longitudinal	common_garden	5	3.31429	S	H	GB	48	3.8712
2.3	90	longitudinal	common_garden	6	2.88571	S	L	GB	57	4.04305
2.3	20	ignore	common_garden	7	2.85714	S	H	IL	61	4.11087
2.3	20	ignore	common_garden	8	2.28571	S	L	IL	18	2.89037
2.3	20	ignore	common_garden	9	2.97143	N	H	IL	63	4.14313
2.3	20	ignore	common_garden	10	2.2	N	L	IL	41	3.71357
2.3	90	longitudinal	common_garden	11	4.14286	N	H	IL	74	4.30407
2.3	90	longitudinal	common_garden	12	4.14286	N	H	IL	68	4.21951
2.3	20	ignore	common_garden	13	2.28571	S	H	FI	17	2.83321
2.3	20	ignore	common_garden	14	2.85714	S	L	FI	28	3.3322
2.3	20	ignore	common_garden	15	2.77143	N	H	FI	47	3.85015
2.3	20	ignore	common_garden	16	2.08571	N	L	FI	18	2.89037
2.3	90	longitudinal	common_garden	17	4.05714	N	H	FI	61	4.11087
2.3	90	longitudinal	common_garden	18	4	N	L	FI	69	4.23411
2.3	90	longitudinal	common_garden	19	3.71429	S	H	HU	19	2.94444
2.3	90	longitudinal	common_garden	20	3.22857	S	H	HU	37	3.61092
2.3	90	longitudinal	common_garden	21	2.77143	S	L	HU	37	3.61092
2.3	90	longitudinal	common_garden	22	2.31429	S	L	HU	42	3.73767
2.3	20	ignore	common_garden	23	2.51429	S	H	GB	38	3.63759
2.3	20	ignore	common_garden	24	2.02857	S	L	GB	46	3.82864
2.3	90	longitudinal	common_garden	25	3.42857	S	H	GB	32	3.46574
2.3	90	longitudinal	common_garden	26	2.77143	S	L	GB	58	4.06044

## Sheet: LPO_PlateReader
run	ID	Clone	Food	L, mm	WWcalc	eggs	485/528_bg	530/590_bg	485/528_60min	530/590_60min	O/(O+R)60min
1	1	FI	S	3	2.40337	3	290	520	893	18508	0.032435
1	2	FI	N	3.55172	3.76763	2	256	653	782	7912	0.0675658
1	3	GB	S	3.13793	2.709	2	271	374	856	11868	0.0484312
1	4	GB	N	3.27586	3.0378	6	233	373	760	8898	0.0582192
1	5	HU	S	2.93103	2.25904	2	262	454	838	12263	0.0465079
1	6	HU	N	3.37931	3.30002	8	244	398	775	19627	0.0268725
1	7	IL	S	3.48276	3.57594	7	264	622	856	15833	0.0374612
1	8	IL	N	3.7931	4.4886	6	249	462	824	18991	0.0300984
1	9	FI	S	3	2.40337	3	251	462	704	11068	0.0409621
1	10	FI	N	3.68966	4.16996	5	225	466	705	12420	0.0386038
1	11	GB	S	3.10345	2.63044	6	260	417	705	18766	0.0236778
1	12	GB	N	3.41379	3.39046	6	232	441	726	10778	0.0456098
1	13	HU	S	3.24138	2.95339	3	265	474	911	13407	0.0475735
1	14	HU	N	3.2069	2.87046	4	248	381	858	11187	0.0534338
1	15	IL	S	3.48276	3.57594	2	260	534	910	13181	0.0488832
1	16	IL	N	3.68966	4.16996	4	241	353	873	7632	0.0798888
1	17	FI	S	3.17241	2.789	2	287	619	892	11931	0.0507678
1	18	FI	N	3.37931	3.30002	1	242	487	862	8449	0.0722442
1	19	GB	S	3	2.40337	2	272	377	849	11479	0.0494049
1	20	GB	N	3.44828	3.48243	5	254	509	864	25593	0.023741
1	21	HU	S	3.10345	2.63044	4	297	427	896	25236	0.0235753
1	22	HU	N	3.31034	3.12371	6	279	560	802	45013	0.0116284
1	23	IL	S	3.65517	4.06698	2	260	476	808	8190	0.0663278
1	24	IL	N	3.62069	3.9656	4	240	403	767	14009	0.0372886
1	25	FI	S	3.06897	2.55333	4	321	774	842	52290	0.0100121
1	26	FI	N	3.24138	2.95339	3	246	414	853	9484	0.0627261
1	27	GB	S	2.89655	2.18895	2	266	395	832	9814	0.056685
1	28	GB	N	3.41379	3.39046	5	228	413	768	12353	0.0432692
1	29	HU	S	3.24138	2.95339	3	280	466	893	14009	0.0433032
1	30	HU	N	3.31034	3.12371	5	243	362	838	16966	0.034595
1	31	IL	S	3.55172	3.76763	2	251	453	894	9741	0.0647468
1	32	IL	N	3.96552	5.05267	5	241	399	870	15989	0.0387817
2	33	FI	S	3.24138	2.95339	4	311	389	1657	12350	0.10115
2	34	FI	N	3.44828	3.48243	1	258	455	1369	7786	0.131604
2	35	GB	S	2.96552	2.33051	0	290	415	1639	11788	0.106037
2	36	GB	N	3.34483	3.21111	0	251	385	1273	7457	0.126266
2	37	HU	S	3.17241	2.789	0	282	385	1772	12505	0.109478
2	38	HU	N	3.55172	3.76763	0	252	365	1602	8875	0.136917
2	39	IL	S	3.58621	3.86582	3	274	424	1704	9928	0.130785
2	40	IL	N	3.89655	4.82204	1	228	300	1476	6652	0.164211
2	41	FI	S	3.06897	2.55333	4	274	403	1631	16421	0.0781007
2	42	FI	N	3.55172	3.76763	0	244	418	1258	8858	0.107256
2	43	GB	S	3.27586	3.0378	0	255	348	1563	14979	0.0820629
2	44	GB	N	3.24138	2.95339	0	222	356	1502	7660	0.149115
2	45	HU	S	3.2069	2.87046	0	268	398	1651	14350	0.0901858
2	46	HU	N	3.48276	3.57594	2	248	370	1595	10180	0.120731
2	47	IL	S	3.72414	4.27455	2	263	416	1707	9397	0.138513
2	48	IL	N	4.06897	5.41134	1	236	308	1575	8100	0.146643
2	49	FI	S	3.10345	2.63044	1	239	352	1651	8632	0.145687
2	50	FI	N	3.44828	3.48243	0	251	412	1231	10522	0.0883679
2	51	GB	S	3.17241	2.789	3	273	369	1744	16901	0.0817086
2	52	GB	N	3.17241	2.789	0	233	358	1711	9669	0.136991
2	53	HU	S	3.31034	3.12371	4	280	403	1676	15039	0.0870758
2	54	HU	N	3.48276	3.57594	0	224	338	1222	7592	0.12094
2	55	IL	S	3.7931	4.4886	0	260	515	1612	9604	0.12949
2	56	IL	N	3.7931	4.4886	0	218	348	1412	6702	0.158188
2	57	FI	S	2.96552	2.33051	4	266	377	1601	21962	0.0582461
2	58	FI	N	3.31034	3.12371	0	238	408	1455	7115	0.153584
2	59	GB	S	3.27586	3.0378	5	261	365	1609	23322	0.0554618
2	60	GB	N	3.41379	3.39046	2	243	421	1621	12155	0.105095
2	61	HU	S	3.24138	2.95339	4	283	412	1729	16387	0.0830033
2	62	HU	N	3.48276	3.57594	0	242	435	1296	8677	0.113382
2	63	IL	S	3.7931	4.4886	0	322	673	1868	23107	0.0644704
2	64	IL	N	3.89655	4.82204	0	230	406	1228	6745	0.136023

## Sheet: LPO_Miscroscopy
Age	ImageID	Clone	Food	tissue	Individual	Median of green	Median of red	G/(G+R)_medians
O	LPOMat2022run1_Image003-FI-S24h-2abd.tif	FI	S	ovary	2	45	130	0.257143
O	LPOMat2022run1_Image003-FI-S24h-2abd.tif	FI	S	FB	2	17	60	0.220779
O	LPOMat2022run1_Image004-FI-S24h-2upp.tif	FI	S	nephridium	2	28	88	0.241379
O	LPOMat2022run1_Image005-FI-S24h-3abd.tif	FI	S	ovary	3	33	79	0.294643
O	LPOMat2022run1_Image005-FI-S24h-3abd.tif	FI	S	FB	3	22	57	0.278481
O	LPOMat2022run1_Image006-FI-S24h-3upp.tif	FI	S	nephridium	3	30	63	0.322581
O	LPOMat2022run1_Image007-GB-S24h-1abd.tif	GB	S	ovary	1	30	84	0.263158
O	LPOMat2022run1_Image007-GB-S24h-1abd.tif	GB	S	FB	1	15	52	0.223881
O	LPOMat2022run1_Image008-GB-S24h-1upp.tif	GB	S	nephridium	1	30	97	0.23622
O	LPOMat2022run1_Image009-GB-S24h-2abd.tif	GB	S	ovary	2	29	81	0.263636
O	LPOMat2022run1_Image009-GB-S24h-2abd.tif	GB	S	FB	2	19	68	0.218391
O	LPOMat2022run1_Image010-GB-S24h-2upp.tif	GB	S	nephridium	2	25	84	0.229358
O	LPOMat2022run1_Image011-HU-S24h-1abd.tif	HU	S	ovary	1	37	128	0.224242
O	LPOMat2022run1_Image011-HU-S24h-1abd.tif	HU	S	FB	1	19	85	0.182692
O	LPOMat2022run1_Image012-HU-S24h-1upp.tif	HU	S	nephridium	1	34	131	0.206061
O	LPOMat2022run1_Image013-HU-S24h-2abd.tif	HU	S	ovary	2	15	53	0.220588
O	LPOMat2022run1_Image013-HU-S24h-2abd.tif	HU	S	FB	2	23	83	0.216981
O	LPOMat2022run1_Image014-HU-S24h-2upp.tif	HU	S	nephridium	2	30	111	0.212766
O	LPOMat2022run1_Image015-HU-S24h-3abd.tif	HU	S	ovary	3	49	158	0.236715
O	LPOMat2022run1_Image015-HU-S24h-3abd.tif	HU	S	FB	3	17	73	0.188889
O	LPOMat2022run1_Image016-HU-S24h-3upp.tif	HU	S	nephridium	3	28	105	0.210526
O	LPOMat2022run1_Image017-IL-S24h-1abd.tif	IL	S	ovary	1	23	97	0.191667
O	LPOMat2022run1_Image017-IL-S24h-1abd.tif	IL	S	FB	1	23	104	0.181102
O	LPOMat2022run1_Image018-IL-S24h-1upp.tif	IL	S	nephridium	1	34	138	0.197674
O	LPOMat2022run1_Image019-IL-S24h-2abd.tif	IL	S	ovary	2	31	92	0.252033
O	LPOMat2022run1_Image019-IL-S24h-2abd.tif	IL	S	FB	2	31	104	0.22963
O	LPOMat2022run1_Image020-IL-S24h-2upp.tif	IL	S	nephridium	2	32	105	0.233577
O	LPOMat2022run1_Image021-FI-N24h-1abd.tif	FI	N	ovary	1	15	23	0.394737
O	LPOMat2022run1_Image021-FI-N24h-1abd.tif	FI	N	FB	1	6	15	0.285714
O	LPOMat2022run1_Image022-FI-N24h-1upp.tif	FI	N	nephridium	1	21	38	0.355932
O	LPOMat2022run1_Image023-FI-N24h-2abd.tif	FI	N	ovary	2	38	77	0.330435
O	LPOMat2022run1_Image023-FI-N24h-2abd.tif	FI	N	FB	2	15	34	0.306122
O	LPOMat2022run1_Image024-FI-N24h-2upp.tif	FI	N	nephridium	2	29	51	0.3625
O	LPOMat2022run1_Image025-FI-N24h-3abd.tif	FI	N	ovary	3	28	89	0.239316
O	LPOMat2022run1_Image025-FI-N24h-3abd.tif	FI	N	FB	3	20	73	0.215054
O	LPOMat2022run1_Image026-FI-N24h-3upp.tif	FI	N	nephridium	3	31	104	0.22963
O	LPOMat2022run1_Image027-GB-N24h-1abd.tif	GB	N	ovary	1	46	156	0.227723
O	LPOMat2022run1_Image027-GB-N24h-1abd.tif	GB	N	FB	1	24	86	0.218182
O	LPOMat2022run1_Image028-GB-N24h-1upp.tif	GB	N	nephridium	1	33	89	0.270492
O	LPOMat2022run1_Image029-GB-N24h-2abd.tif	GB	N	ovary	2	27	101	0.210938
O	LPOMat2022run1_Image029-GB-N24h-2abd.tif	GB	N	FB	2	17	64	0.209877
O	LPOMat2022run1_Image030-GB-N24h-2upp.tif	GB	N	nephridium	2	26	75	0.257426
O	LPOMat2022run1_Image031-GB-N24h-3abd.tif	GB	N	ovary	3	23	66	0.258427
O	LPOMat2022run1_Image031-GB-N24h-3abd.tif	GB	N	FB	3	22	72	0.234043
O	LPOMat2022run1_Image032-GB-N24h-3upp.tif	GB	N	nephridium	3	31	84	0.269565
O	LPOMat2022run1_Image033-HU-N24h-1abd.tif	HU	N	ovary	1	29	85	0.254386
O	LPOMat2022run1_Image033-HU-N24h-1abd.tif	HU	N	FB	1	16	50	0.242424
O	LPOMat2022run1_Image034-HU-N24h-1upp.tif	HU	N	nephridium	1	22	47	0.318841
O	LPOMat2022run1_Image035-HU-N24h-2abd.tif	HU	N	ovary	2	30	67	0.309278
O	LPOMat2022run1_Image035-HU-N24h-2abd.tif	HU	N	FB	2	16	39	0.290909
O	LPOMat2022run1_Image036-HU-N24h-2upp.tif	HU	N	nephridium	2	25	53	0.320513
O	LPOMat2022run1_Image037-IL-N24h-1abd.tif	IL	N	ovary	1	14	42	0.25
O	LPOMat2022run1_Image037-IL-N24h-1abd.tif	IL	N	FB	1	15	41	0.267857
O	LPOMat2022run1_Image038-IL-N24h-1upp.tif	IL	N	nephridium	1	42	65	0.392523
O	LPOMat2022run1_Image039-IL-N24h-2abd.tif	IL	N	ovary	2	13	44	0.22807
O	LPOMat2022run1_Image039-IL-N24h-2abd.tif	IL	N	FB	2	13	46	0.220339
O	LPOMat2022run1_Image040-IL-N24h-2upp.tif	IL	N	nephridium	2	19	52	0.267606
Y	LPO_May2022_Young_Image002_FI_S1abd.tif	FI	S	ovary	1	48	137	0.259459
Y	LPO_May2022_Young_Image002_FI_S1abd.tif	FI	S	FB	1	18	69	0.206897
Y	LPO_May2022_Young_Image003_FI_S1upp.tif	FI	S	nephridium	1	28	89	0.239316
Y	LPO_May2022_Young_Image004_FI_S2abd.tif	FI	S	ovary	2	60	144	0.294118
Y	LPO_May2022_Young_Image004_FI_S2abd.tif	FI	S	FB	2	26	102	0.203125
Y	LPO_May2022_Young_Image005_FI_S2upp.tif	FI	S	nephridium	2	37	116	0.24183
Y	LPO_May2022_Young_Image006_FI_S3abd.tif	FI	S	ovary	3	69	193	0.263359
Y	LPO_May2022_Young_Image006_FI_S3abd.tif	FI	S	FB	3	19	76	0.2
Y	LPO_May2022_Young_Image007_FI_S3upp.tif	FI	S	nephridium	3	29	84	0.256637
Y	LPO_May2022_Young_Image008_FI_S4abd.tif	FI	S	ovary	4	45	148	0.233161
Y	LPO_May2022_Young_Image008_FI_S4abd.tif	FI	S	FB	4	26	126	0.171053
Y	LPO_May2022_Young_Image009_FI_S4upp.tif	FI	S	nephridium	4	36	145	0.198895
Y	LPO_May2022_Young_Image014_GB_S1abd.tif	GB	S	ovary	1	82	151	0.351931
Y	LPO_May2022_Young_Image014_GB_S1abd.tif	GB	S	FB	1	42	96	0.304348
Y	LPO_May2022_Young_Image015_GB_S1upp.tif	GB	S	nephridium	1	56	112	0.333333
Y	LPO_May2022_Young_Image016_GB_S2abd.tif	GB	S	ovary	2	74	151	0.328889
Y	LPO_May2022_Young_Image016_GB_S2abd.tif	GB	S	FB	2	29	87	0.25
Y	LPO_May2022_Young_Image017_GB_S2upp.tif	GB	S	nephridium	2	40	106	0.273973
Y	LPO_May2022_Young_Image018_GB_S3abd.tif	GB	S	ovary	3	75	166	0.311203
Y	LPO_May2022_Young_Image018_GB_S3abd.tif	GB	S	FB	3	46	115	0.285714
Y	LPO_May2022_Young_Image019_GB_S3upp.tif	GB	S	nephridium	3	48	109	0.305732
Y	LPO_May2022_Young_Image020_GB_S4abd.tif	GB	S	ovary	4	50	111	0.310559
Y	LPO_May2022_Young_Image020_GB_S4abd.tif	GB	S	FB	4	37	92	0.286822
Y	LPO_May2022_Young_Image021_GB_S4upp.tif	GB	S	nephridium	4	183	255	0.417808
Y	LPO_May2022_Young_Image027_HU_S1abd.tif	HU	S	ovary	1	52	133	0.281081
Y	LPO_May2022_Young_Image027_HU_S1abd.tif	HU	S	FB	1	26	122	0.175676
Y	LPO_May2022_Young_Image028_HU_S1upp.tif	HU	S	nephridium	1	34	130	0.207317
Y	LPO_May2022_Young_Image029_HU_S2abd.tif	HU	S	ovary	2	53	134	0.283422
Y	LPO_May2022_Young_Image029_HU_S2abd.tif	HU	S	FB	2	21	102	0.170732
Y	LPO_May2022_Young_Image030_HU_S2upp.tif	HU	S	nephridium	2	30	118	0.202703
Y	LPO_May2022_Young_Image031_HU_S3abd.tif	HU	S	ovary	3	88	220	0.285714
Y	LPO_May2022_Young_Image031_HU_S3abd.tif	HU	S	FB	3	21	97	0.177966
Y	LPO_May2022_Young_Image032_HU_S3upp.tif	HU	S	nephridium	3	29	110	0.208633
Y	LPO_May2022_Young_Image033_HU_S4abd.tif	HU	S	ovary	4	52	147	0.261307
Y	LPO_May2022_Young_Image033_HU_S4abd.tif	HU	S	FB	4	26	121	0.176871
Y	LPO_May2022_Young_Image034_HU_S4upp.tif	HU	S	nephridium	4	34	136	0.2
Y	LPO_May2022_Young_Image039_IL_S1abd.tif	IL	S	ovary	1	40	187	0.176211
Y	LPO_May2022_Young_Image039_IL_S1abd.tif	IL	S	FB	1	23	139	0.141975
Y	LPO_May2022_Young_Image040_IL_S1upp.tif	IL	S	nephridium	1	33	155	0.175532
Y	LPO_May2022_Young_Image041_IL_S2abd.tif	IL	S	ovary	2	39	194	0.167382
Y	LPO_May2022_Young_Image041_IL_S2abd.tif	IL	S	FB	2	25	152	0.141243
Y	LPO_May2022_Young_Image042_IL_S2upp.tif	IL	S	nephridium	2	35	179	0.163551
Y	LPO_May2022_Young_Image043_IL_S3abd.tif	IL	S	ovary	3	25	144	0.147929
Y	LPO_May2022_Young_Image043_IL_S3abd.tif	IL	S	FB	3	18	101	0.151261
Y	LPO_May2022_Young_Image044_IL_S3upp.tif	IL	S	nephridium	3	29	134	0.177914
Y	LPO_May2022_Young_Image045_IL_S4abd.tif	IL	S	ovary	4	37	203	0.154167
Y	LPO_May2022_Young_Image045_IL_S4abd.tif	IL	S	FB	4	24	137	0.149068
Y	LPO_May2022_Young_Image046_IL_S4upp.tif	IL	S	nephridium	4	33	154	0.176471
Y	LPO_May2022_Young_Image052_FI_N1abd.tif	FI	N	ovary	1	44	145	0.232804
Y	LPO_May2022_Young_Image052_FI_N1abd.tif	FI	N	FB	1	22	107	0.170543
Y	LPO_May2022_Young_Image053_FI_N1upp.tif	FI	N	nephridium	1	28	109	0.20438
Y	LPO_May2022_Young_Image054_FI_N2abd.tif	FI	N	ovary	2	88	184	0.323529
Y	LPO_May2022_Young_Image054_FI_N2abd.tif	FI	N	FB	2	40	99	0.28777
Y	LPO_May2022_Young_Image055_FI_N2upp.tif	FI	N	nephridium	2	44	80	0.354839
Y	LPO_May2022_Young_Image056_FI_N3abd.tif	FI	N	ovary	3	38	125	0.233129
Y	LPO_May2022_Young_Image056_FI_N3abd.tif	FI	N	FB	3	22	70	0.23913
Y	LPO_May2022_Young_Image057_FI_N3upp.tif	FI	N	nephridium	3	32	76	0.296296
Y	LPO_May2022_Young_Image058_FI_N4abd.tif	FI	N	ovary	4	24	86	0.218182
Y	LPO_May2022_Young_Image058_FI_N4abd.tif	FI	N	FB	4	16	65	0.197531
Y	LPO_May2022_Young_Image059_FI_N4upp.tif	FI	N	nephridium	4	28	90	0.237288
Y	LPO_May2022_Young_Image063_GB_N1abd.tif	GB	N	ovary	1	68	97	0.412121
Y	LPO_May2022_Young_Image063_GB_N1abd.tif	GB	N	FB	1	19	60	0.240506
Y	LPO_May2022_Young_Image064_GB_N1upp.tif	GB	N	nephridium	1	31	74	0.295238
Y	LPO_May2022_Young_Image065_GB_N2abd.tif	GB	N	ovary	2	43	94	0.313869
Y	LPO_May2022_Young_Image065_GB_N2abd.tif	GB	N	FB	2	40	124	0.243902
Y	LPO_May2022_Young_Image066_GB_N2upp.tif	GB	N	nephridium	2	45	124	0.266272
Y	LPO_May2022_Young_Image067_GB_N3abd.tif	GB	N	ovary	3	28	78	0.264151
Y	LPO_May2022_Young_Image067_GB_N3abd.tif	GB	N	FB	3	15	59	0.202703
Y	LPO_May2022_Young_Image068_GB_N3upp.tif	GB	N	nephridium	3	84	109	0.435233
Y	LPO_May2022_Young_Image069_GB_N4abd.tif	GB	N	ovary	4	31	55	0.360465
Y	LPO_May2022_Young_Image069_GB_N4abd.tif	GB	N	FB	4	17	31	0.354167
Y	LPO_May2022_Young_Image070_GB_N4upp.tif	GB	N	nephridium	4	33	56	0.370787
Y	LPO_May2022_Young_Image076_HU_N1abd.tif	HU	N	ovary	1	168	193	0.465374
Y	LPO_May2022_Young_Image076_HU_N1abd.tif	HU	N	FB	1	48	85	0.360902
Y	LPO_May2022_Young_Image077_HU_N1upp.tif	HU	N	nephridium	1	57	81	0.413043
Y	LPO_May2022_Young_Image078_HU_N2abd.tif	HU	N	ovary	2	99	116	0.460465
Y	LPO_May2022_Young_Image078_HU_N2abd.tif	HU	N	FB	2	37	100	0.270073
Y	LPO_May2022_Young_Image079_HU_N2upp.tif	HU	N	nephridium	2	42	92	0.313433
Y	LPO_May2022_Young_Image080_HU_N3abd.tif	HU	N	ovary	3	119	155	0.434307
Y	LPO_May2022_Young_Image080_HU_N3abd.tif	HU	N	FB	3	48	80	0.375
Y	LPO_May2022_Young_Image081_HU_N3upp.tif	HU	N	nephridium	3	53	76	0.410853
Y	LPO_May2022_Young_Image083_HU_N4abd.tif	HU	N	ovary	4	82	118	0.41
Y	LPO_May2022_Young_Image083_HU_N4abd.tif	HU	N	FB	4	20	44	0.3125
Y	LPO_May2022_Young_Image084_HU_N4upp.tif	HU	N	nephridium	4	35	63	0.357143
Y	LPO_May2022_Young_Image093_IL_N1abd.tif	IL	N	ovary	1	38	133	0.222222
Y	LPO_May2022_Young_Image093_IL_N1abd.tif	IL	N	FB	1	26	107	0.195489
Y	LPO_May2022_Young_Image094_IL_N1upp.tif	IL	N	nephridium	1	41	153	0.21134
Y	LPO_May2022_Young_Image095_IL_N2abd.tif	IL	N	ovary	2	48	236	0.169014
Y	LPO_May2022_Young_Image095_IL_N2abd.tif	IL	N	FB	2	25	134	0.157233
Y	LPO_May2022_Young_Image096_IL_N2upp.tif	IL	N	nephridium	2	38	152	0.2
Y	LPO_May2022_Young_Image097_IL_N3abd.tif	IL	N	ovary	3	27	125	0.177632
Y	LPO_May2022_Young_Image097_IL_N3abd.tif	IL	N	FB	3	22	96	0.186441
Y	LPO_May2022_Young_Image098_IL_N3upp.tif	IL	N	nephridium	3	31	99	0.238462
Y	LPO_May2022_Young_Image099_IL_N4abd.tif	IL	N	ovary	4	38	110	0.256757
Y	LPO_May2022_Young_Image099_IL_N4abd.tif	IL	N	FB	4	13	51	0.203125
Y	LPO_May2022_Young_Image100_IL_N4upp.tif	IL	N	nephridium	4	30	82	0.267857

## Sheet: MitochondrialMembranePotential
Age	Food	Clone	tissue	Label of Rh123_SNexperiment-bg.jmp	Median of Rh123_SNexperiment.jmp	Median of bg of Rh123_SNexperiment-bg.jmp	MedianMMP
Y	N	IL	brain	OldYoungNS.xlef_Image003_YNI1head.tif	47	2	45
Y	N	IL	ep	OldYoungNS.xlef_Image006_YNI1e.tif	29	11	18
Y	N	IL	heart	OldYoungNS.xlef_Image004_YNI1hm.tif	11	11	0
Y	N	IL	muscle	OldYoungNS.xlef_Image004_YNI1hm.tif	11	11	0
Y	N	IL	brain	OldYoungNS.xlef_Image010_YNI2head.tif	61	5	56
Y	N	IL	ep	OldYoungNS.xlef_Image009_YNI2e.tif	19	1	18
Y	N	IL	heart	OldYoungNS.xlef_Image011_YNI2hm.tif	13	3	10
Y	N	IL	muscle	OldYoungNS.xlef_Image011_YNI2hm.tif	20	3	17
Y	N	IL	brain	OldYoungNS.xlef_Image012_YNI3head.tif	60	10	50
Y	N	IL	ep	OldYoungNS.xlef_Image017_YNI3e.tif	29	1	28
Y	N	IL	heart	OldYoungNS.xlef_Image013_YNI3hm.tif	14	7	7
Y	N	IL	muscle	OldYoungNS.xlef_Image013_YNI3hm.tif	14	7	7
Y	N	HU	brain	OldYoungNS.xlef_Image018_YNH1head.tif	55	6	49
Y	N	HU	ep	OldYoungNS.xlef_Image022.tif	24	3	21
Y	N	HU	heart	OldYoungNS.xlef_Image019.tif	10	6	4
Y	N	HU	muscle	OldYoungNS.xlef_Image019.tif	19	6	13
Y	N	HU	brain	OldYoungNS.xlef_Image020.tif	56	4	52
Y	N	HU	ep	OldYoungNS.xlef_Image023.tif	21	0	21
Y	N	HU	heart	OldYoungNS.xlef_Image025.tif	12	2	10
Y	N	HU	muscle	OldYoungNS.xlef_Image025.tif	9	2	7
Y	N	HU	brain	OldYoungNS.xlef_Image021.tif	48	4	44
Y	N	HU	ep	OldYoungNS.xlef_Image024.tif	22	0	22
Y	N	HU	heart	OldYoungNS.xlef_Image026.tif	8	2	6
Y	N	HU	muscle	OldYoungNS.xlef_Image026.tif	11	2	9
Y	N	GB	brain	OldYoungNS.xlef_Image027.tif	58	5	53
Y	N	GB	ep	OldYoungNS.xlef_Image033.tif	20	0	20
Y	N	GB	heart	OldYoungNS.xlef_Image031.tif	9	2	7
Y	N	GB	muscle	OldYoungNS.xlef_Image031.tif	14	2	12
Y	N	GB	brain	OldYoungNS.xlef_Image030.tif	64	7	57
Y	N	GB	ep	OldYoungNS.xlef_Image034.tif	28	0	28
Y	N	GB	heart	OldYoungNS.xlef_Image032.tif	10	2	8
Y	N	GB	muscle	OldYoungNS.xlef_Image032.tif	9	2	7
Y	N	FI	brain	OldYoungNS.xlef_Image035.tif	47	11	36
Y	N	FI	ep	OldYoungNS.xlef_Image043.tif	19	3	16
Y	N	FI	heart	OldYoungNS.xlef_Image039.tif	15	3	12
Y	N	FI	muscle	OldYoungNS.xlef_Image039.tif	10	3	7
Y	N	FI	brain	OldYoungNS.xlef_Image036.tif	53	13	40
Y	N	FI	ep	OldYoungNS.xlef_Image045.tif	19	1	18
Y	N	FI	heart	OldYoungNS.xlef_Image040.tif	10	3	7
Y	N	FI	muscle	OldYoungNS.xlef_Image040.tif	10	3	7
Y	N	FI	brain	OldYoungNS.xlef_Image037.tif	67	8	59
Y	N	FI	ep	OldYoungNS.xlef_Image046.tif	21	1	20
Y	N	FI	heart	OldYoungNS.xlef_Image041.tif	9	3	6
Y	N	FI	muscle	OldYoungNS.xlef_Image041.tif	10	3	7
Y	N	FI	brain	OldYoungNS.xlef_Image038.tif	64	5	59
Y	N	FI	ep	OldYoungNS.xlef_Image047.tif	17	5	12
Y	N	FI	heart	OldYoungNS.xlef_Image042.tif	9	3	6
Y	N	FI	muscle	OldYoungNS.xlef_Image042.tif	8	3	5
O	S	GB	brain	OldYoungNS.xlef_Image048.tif	65	3	62
O	S	GB	ep	OldYoungNS.xlef_Image055.tif	18	8	10
O	S	GB	heart	OldYoungNS.xlef_Image051.tif	26	4	22
O	S	GB	muscle	OldYoungNS.xlef_Image051.tif	26	4	22
O	S	GB	brain	OldYoungNS.xlef_Image049.tif	71	1	70
O	S	GB	ep	OldYoungNS.xlef_Image056.tif	34	2	32
O	S	GB	heart	OldYoungNS.xlef_Image052.tif	10	2	8
O	S	GB	muscle	OldYoungNS.xlef_Image052.tif	12	2	10
O	S	GB	brain	OldYoungNS.xlef_Image050.tif	49	10	39
O	S	GB	ep	OldYoungNS.xlef_Image057.tif	29	0	29
O	S	GB	heart	OldYoungNS.xlef_Image053.tif	14	1	13
O	S	GB	muscle	OldYoungNS.xlef_Image053.tif	8	1	7
Y	S	FI	brain	Rh123_SN_March13_Image001.tif	39	3	36
Y	S	FI	ep	Rh123_SN_March13_Image003.tif	47	2	45
Y	S	FI	heart	Rh123_SN_March13_Image002-1.tif	9	6	3
Y	S	FI	muscle	Rh123_SN_March13_Image002-1.tif	9	6	3
Y	S	FI	ep	Rh123_SN_March13_Image009.tif	62	10	52
Y	S	FI	heart	Rh123_SN_March13_Image008.tif	20	8	12
Y	S	FI	muscle	Rh123_SN_March13_Image008.tif	18	8	10
Y	S	FI	ep	Rh123_SN_March13_Image019.tif	64	5	59
Y	S	FI	heart	Rh123_SN_March13_Image017.tif	45	42	3
Y	S	FI	muscle	Rh123_SN_March13_Image017.tif	51	42	9
Y	S	GB	ep	Rh123_SN_March13_Image041.tif	72	3	69
Y	S	GB	heart	Rh123_SN_March13_Image038.tif	15	6	9
Y	S	GB	muscle	Rh123_SN_March13_Image038.tif	14	6	8
Y	S	GB	brain	Rh123_SN_March13_Image035.tif	93	8	85
Y	S	GB	ep	Rh123_SN_March13_Image042.tif	99	4	95
Y	S	GB	heart	Rh123_SN_March13_Image039.tif	29	9	20
Y	S	GB	muscle	Rh123_SN_March13_Image039.tif	26	9	17
Y	S	GB	brain	Rh123_SN_March13_Image037.tif	66	5	61
Y	S	GB	ep	Rh123_SN_March13_Image043.tif	71	9	62
Y	S	GB	heart	Rh123_SN_March13_Image040.tif	20	5	15
Y	S	GB	muscle	Rh123_SN_March13_Image040.tif	17	5	12
Y	S	HU	brain	Rh123_SN_March13_Image056.tif	62	5	57
Y	S	HU	ep	Rh123_SN_March13_Image064.tif	61	5	56
Y	S	HU	heart	Rh123_SN_March13_Image061.tif	16	12	4
Y	S	HU	muscle	Rh123_SN_March13_Image061.tif	13	12	1
Y	S	HU	brain	Rh123_SN_March13_Image059.tif	62	11	51
Y	S	HU	ep	Rh123_SN_March13_Image065.tif	76	7	69
Y	S	HU	heart	Rh123_SN_March13_Image062.tif	16	7	9
Y	S	HU	muscle	Rh123_SN_March13_Image062.tif	16	7	9
Y	S	HU	brain	Rh123_SN_March13_Image060.tif	61	7	54
Y	S	HU	ep	Rh123_SN_March13_Image066.tif	60	4	56
Y	S	HU	heart	Rh123_SN_March13_Image063.tif	17	9	8
Y	S	HU	muscle	Rh123_SN_March13_Image063.tif	16	9	7
Y	S	IL	brain	Rh123_SN_March13_Image079.tif	77	7	70
Y	S	IL	ep	Rh123_SN_March13_Image089.tif	74	11	63
Y	S	IL	heart	Rh123_SN_March13_Image086.tif	14	6	8
Y	S	IL	muscle	Rh123_SN_March13_Image086.tif	11	6	5
Y	S	IL	brain	Rh123_SN_March13_Image082.tif	91	3	88
Y	S	IL	ep	Rh123_SN_March13_Image091.tif	77	12	65
Y	S	IL	heart	Rh123_SN_March13_Image087.tif	15	4	11
Y	S	IL	muscle	Rh123_SN_March13_Image087.tif	12	4	8
Y	S	IL	brain	Rh123_SN_March13_Image084.tif	79	4	75
Y	S	IL	ep	Rh123_SN_March13_Image092.tif	65	5	60
Y	S	IL	heart	Rh123_SN_March13_Image088.tif	15	6	9
Y	S	IL	muscle	Rh123_SN_March13_Image088.tif	18	6	12
Y	N	FI	brain	Rh123_SN_March13_Image021.tif	61	2	59
Y	N	FI	ep	Rh123_SN_March13_Image030.tif	51	3	48
Y	N	FI	heart	Rh123_SN_March13_Image023.tif	8	4	4
Y	N	FI	muscle	Rh123_SN_March13_Image023.tif	17	4	13
Y	N	FI	brain	Rh123_SN_March13_Image024.tif	52	4	48
Y	N	FI	ep	Rh123_SN_March13_Image031.tif	48	7	41
Y	N	FI	heart	Rh123_SN_March13_Image027.tif	9	4	5
Y	N	FI	muscle	Rh123_SN_March13_Image027.tif	9	4	5
Y	N	FI	brain	Rh123_SN_March13_Image025.tif	49	5	44
Y	N	FI	ep	Rh123_SN_March13_Image032.tif	49	7	42
Y	N	FI	heart	Rh123_SN_March13_Image029.tif	7	4	3
Y	N	FI	muscle	Rh123_SN_March13_Image029.tif	7	4	3
Y	N	GB	brain	Rh123_SN_March13_Image044.tif	53	5	48
Y	N	GB	ep	Rh123_SN_March13_Image052.tif	58	4	54
Y	N	GB	heart	Rh123_SN_March13_Image049.tif	14	5	9
Y	N	GB	muscle	Rh123_SN_March13_Image049.tif	13	5	8
Y	N	GB	brain	Rh123_SN_March13_Image046.tif	58	4	54
Y	N	GB	ep	Rh123_SN_March13_Image053.tif	38	7	31
Y	N	GB	heart	Rh123_SN_March13_Image050.tif	11	3	8
Y	N	GB	muscle	Rh123_SN_March13_Image050.tif	11	3	8
Y	N	GB	brain	Rh123_SN_March13_Image047.tif	66	2	64
Y	N	GB	ep	Rh123_SN_March13_Image055.tif	42	4	38
Y	N	GB	heart	Rh123_SN_March13_Image051.tif	10	6	4
Y	N	GB	muscle	Rh123_SN_March13_Image051.tif	12	6	6
Y	N	HU	brain	Rh123_SN_March13_Image067.tif	49	5	44
Y	N	HU	ep	Rh123_SN_March13_Image073.tif	45	6	39
Y	N	HU	heart	Rh123_SN_March13_Image070.tif	10	4	6
Y	N	HU	muscle	Rh123_SN_March13_Image070.tif	7	4	3
Y	N	HU	brain	Rh123_SN_March13_Image068.tif	72	5	67
Y	N	HU	ep	Rh123_SN_March13_Image075.tif	34	3	31
Y	N	HU	heart	Rh123_SN_March13_Image071.tif	11	7	4
Y	N	HU	muscle	Rh123_SN_March13_Image071.tif	10	7	3
Y	N	HU	brain	Rh123_SN_March13_Image069.tif	61	3	58
Y	N	HU	ep	Rh123_SN_March13_Image076.tif	48	3	45
Y	N	HU	heart	Rh123_SN_March13_Image072.tif	14	5	9
Y	N	HU	muscle	Rh123_SN_March13_Image072.tif	11	5	6
Y	N	IL	brain	Rh123_SN_March13_Image093.tif	50	4	46
Y	N	IL	ep	Rh123_SN_March13_Image100.tif	50	6	44
Y	N	IL	heart	Rh123_SN_March13_Image096.tif	12	9	3
Y	N	IL	muscle	Rh123_SN_March13_Image096.tif	11	9	2
Y	N	IL	brain	Rh123_SN_March13_Image094.tif	67	3	64
Y	N	IL	ep	Rh123_SN_March13_Image101.tif	59	10	49
Y	N	IL	heart	Rh123_SN_March13_Image097.tif	11	7	4
Y	N	IL	muscle	Rh123_SN_March13_Image097.tif	11	7	4
Y	N	IL	brain	Rh123_SN_March13_Image095.tif	63	6	57
Y	N	IL	ep	Rh123_SN_March13_Image102.tif	49	5	44
Y	N	IL	heart	Rh123_SN_March13_Image098.tif	13	9	4
Y	N	IL	muscle	Rh123_SN_March13_Image098.tif	10	9	1
Y	N	IL	optical lobe	OldYoungNS.xlef_Image003_YNI1head.tif	45	2	43
Y	N	IL	optical lobe	OldYoungNS.xlef_Image010_YNI2head.tif	59	5	54
Y	N	IL	optical lobe	OldYoungNS.xlef_Image012_YNI3head.tif	67	10	57
Y	N	HU	optical lobe	OldYoungNS.xlef_Image018_YNH1head.tif	56	6	50
Y	N	HU	optical lobe	OldYoungNS.xlef_Image020.tif	62	4	58
Y	N	HU	optical lobe	OldYoungNS.xlef_Image021.tif	51	4	47
Y	N	GB	optical lobe	OldYoungNS.xlef_Image027.tif	59	5	54
Y	N	GB	optical lobe	OldYoungNS.xlef_Image030.tif	67	7	60
Y	N	FI	optical lobe	OldYoungNS.xlef_Image035.tif	51	11	40
Y	N	FI	optical lobe	OldYoungNS.xlef_Image036.tif	53	13	40
Y	N	FI	optical lobe	OldYoungNS.xlef_Image037.tif	68	8	60
Y	N	FI	optical lobe	OldYoungNS.xlef_Image038.tif	69	5	64
O	S	GB	optical lobe	OldYoungNS.xlef_Image048.tif	62	3	59
O	S	GB	optical lobe	OldYoungNS.xlef_Image049.tif	74	1	73
O	S	GB	optical lobe	OldYoungNS.xlef_Image050.tif	52	10	42
Y	S	FI	optical lobe	Rh123_SN_March13_Image001.tif	65	3	62
Y	S	FI	optical lobe	Rh123_SN_March13_Image007.tif	83	9	74
Y	S	FI	optical lobe	Rh123_SN_March13_Image016.tif	51	6	45
Y	S	GB	optical lobe	Rh123_SN_March13_Image033.tif	90	6	84
Y	S	GB	optical lobe	Rh123_SN_March13_Image035.tif	88	8	80
Y	S	GB	optical lobe	Rh123_SN_March13_Image037.tif	68	5	63
Y	S	HU	optical lobe	Rh123_SN_March13_Image056.tif	65	5	60
Y	S	HU	optical lobe	Rh123_SN_March13_Image059.tif	62	11	51
Y	S	HU	optical lobe	Rh123_SN_March13_Image060.tif	66	7	59
Y	S	IL	optical lobe	Rh123_SN_March13_Image079.tif	78	7	71
Y	S	IL	optical lobe	Rh123_SN_March13_Image082.tif	89	3	86
Y	S	IL	optical lobe	Rh123_SN_March13_Image084.tif	80	4	76
Y	N	FI	optical lobe	Rh123_SN_March13_Image021.tif	62	2	60
Y	N	FI	optical lobe	Rh123_SN_March13_Image024.tif	58	4	54
Y	N	FI	optical lobe	Rh123_SN_March13_Image025.tif	53	5	48
Y	N	GB	optical lobe	Rh123_SN_March13_Image044.tif	58	5	53
Y	N	GB	optical lobe	Rh123_SN_March13_Image046.tif	62	4	58
Y	N	GB	optical lobe	Rh123_SN_March13_Image047.tif	72	2	70
Y	N	HU	optical lobe	Rh123_SN_March13_Image067.tif	53	5	48
Y	N	HU	optical lobe	Rh123_SN_March13_Image068.tif	74	5	69
Y	N	HU	optical lobe	Rh123_SN_March13_Image069.tif	58	3	55
Y	N	IL	optical lobe	Rh123_SN_March13_Image093.tif	53	4	49
Y	N	IL	optical lobe	Rh123_SN_March13_Image094.tif	65	3	62
Y	N	IL	optical lobe	Rh123_SN_March13_Image095.tif	65	6	59
Y	S	FI	brain	Rh123_SN_March13_Image007.tif	34	9	25
Y	S	FI	brain	Rh123_SN_March13_Image016.tif	23	6	17
Y	S	GB	brain	Rh123_SN_March13_Image033.tif	65	6	59
