# Supplementary material for: Dietary polyunsaturated fatty acids affect longevity, heat tolerance, lipid peroxidation and mitochondrial membrane potential in Daphnia.
Source: Research Square preprint supplement (doi:10.21203/rs.3.rs-2015531/v1), 2022-09-28
Supplement: Supplementary file 1 [file a9d6511932da29d1b0d1018b.docx]

Table S1. Proportional hazards model fit to survival data (Wald test) for each food type separately.

|  |  | Food=*Scenedesmus* | | Food=*Nannochloropsis* | |
| --- | --- | --- | --- | --- | --- |
| Source | DF | Wald ChiSquare | Prob>ChiSq | Wald ChiSquare | Prob>ChiSq |
| foodLevel | 1 | 18.67 | <0.0001 | 67.64 | <0.0001 |
| Clone | 3 | 37.06 | <0.0001 | 3.16 | 0.37 |
| foodLevel*Clone | 3 | 5.57 | 0.13 | 6.64 | 0.08 |

Table S2 General linear model analysis of the differences among of age groups (20-30 vs. 80-90 days), food type (*Scenedesmus* vs. *Nannochloropsis*), food concentration (2x104 vs. 2x105 cells/mL) and clones on time until immobilization (Timm) in acute heat shock assays. Left: common garden comparison between 2 cohort of different ages. Right: longitudinal comparisons of individuals from the same cohort at two time points. Body length included in the model as a covariable. Block of measurements included in the model as a random block effect.

|  | Common garden | |  |  | Longitudinal | |  |  |
| --- | --- | --- | --- | --- | --- | --- | --- | --- |
| **Source** | **DF** | **DFden** | **F Ratio** | **P** | **DF** | **DFden** | **F Ratio** | **P** |
| L,mm | 1 | 87.73 | 0.39 | 0.53 | 1 | 167 | 3.29 | 0.07 |
| age | 1 | 87.53 | 0.1 | 0.75 | 1 | 9.6 | 2.6 | 0.14 |
| foodType | 1 | 87.02 | 4.04 | 0.048 | 1 | 164 | 5.34 | 0.022 |
| age*foodType | 1 | 87.03 | 0.47 | 0.49 | 1 | 164.6 | 0.08 | 0.78 |
| foodLevel | 1 | 87.09 | 0.45 | 0.5 | 1 | 166.8 | 15.44 | 0.0001 |
| age*foodLevel | 1 | 87.29 | 10.01 | 0.0021 | 1 | 164.4 | 0.05 | 0.82 |
| foodType*foodLevel | 1 | 87.09 | 0.013 | 0.91 | 1 | 165.5 | 1.15 | 0.28 |
| age*foodType*foodLevel | 1 | 86.99 | 2.76 | 0.1 | 1 | 164.9 | 0.63 | 0.43 |
| Clone | 3 | 87.08 | 12.39 | <0.0001 | 3 | 164 | 10.36 | <0.0001 |
| age*Clone | 3 | 87.15 | 1.09 | 0.36 | 3 | 164 | 1.02 | 0.39 |
| foodType*Clone | 3 | 87.2 | 0.95 | 0.42 | 3 | 165.7 | 0.8 | 0.5 |
| age*foodType*Clone | 3 | 87.1 | 1.38 | 0.25 | 3 | 165.7 | 0.15 | 0.93 |
| foodLevel*Clone | 3 | 86.96 | 1.32 | 0.27 | 3 | 164 | 0.08 | 0.97 |
| age*foodLevel*Clone | 3 | 86.97 | 3.23 | 0.026 | 3 | 164.1 | 0.29 | 0.83 |
| foodType*foodLevel*Clone | 3 | 86.97 | 0.67 | 0.57 | 3 | 164.2 | 0.56 | 0.64 |
| age*foodType*foodLevel*Clone | 3 | 86.97 | 0.81 | 0.49 | 3 | 164.3 | 0.21 | 0.89 |

Table S3. Factors affecting lipid peroxidation (LPO) level in *Daphnia* males. REML analysis the effects of clones, tissue, and food types on LPO measured by fluorescent microscopy, with blocks of measurements as a random effect. LPO was calculated as the ratio of median green to total median green + median red fluorescence, Box-Cox transformed.

| **Source** | **DF** | **SS** | **F Ratio** | **Prob > F** |
| --- | --- | --- | --- | --- |
| Clone | 3 | 0.0900 | 22.94 | **<0.0001** |
| Food | 1 | 0.0361 | 27.58 | **<0.0001** |
| Clone*Food | 3 | 0.0527 | 13.44 | **<0.0001** |
| Tissue | 2 | 0.1297 | 49.59 | **<0.0001** |
| Clone*Tissue | 6 | 0.0389 | 4.96 | **0.0002** |
| Food*Tissue | 2 | 0.00014 | 0.052 | 0.94 |
| Clone*Food*Tissue | 6 | 0.00235 | 0.300 | 0.93 |
| Block | 1 | 0.01763 | 13.49 | **0.0004** |
| Error | 80 | 0.10458 |  |  |


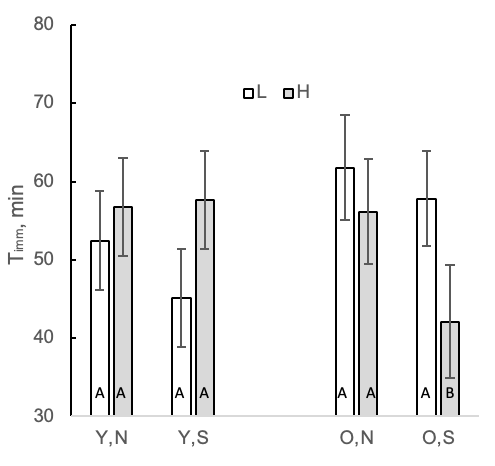

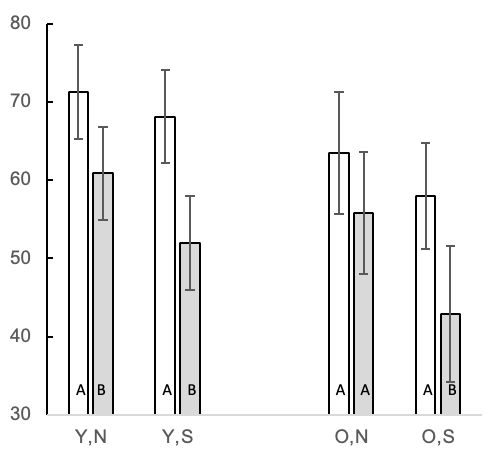


A B

Fig. S1. Time until immobilization in Daphnia reared in either low (0.36 μg C/mL, white bars, L) or high (3.6 μg C/mL, gray bars, H) concentration of either *Nannochloropsis* (N) or *Scenedesmus* (S)food. Y – young *Daphnia* (20-30 days old); O – old *Daphnia* (80-90 days old), analyzed separately in a common garden, cross-cohort (A) and longitudinal, within-cohort (B) comparisons. Error bars are standard errors. Letters represent Tukey test pairwise differences estimated for young and old *Daphnia* and for A and B separately; groups that do not share a letter are significantly different (post-hoc P<0.05). Statistics in Table S2; pooled data analysis in main text Table 3.

Fig. S2. Comparison of LPO in young (20-30 days) vs. old (55-60 days) *Daphnia* (same data as on Main text Fig. 3. In both diets the short-lived clones (FI, IL) increase LPO with age, while long-loved clones (GB, HU) decrease.


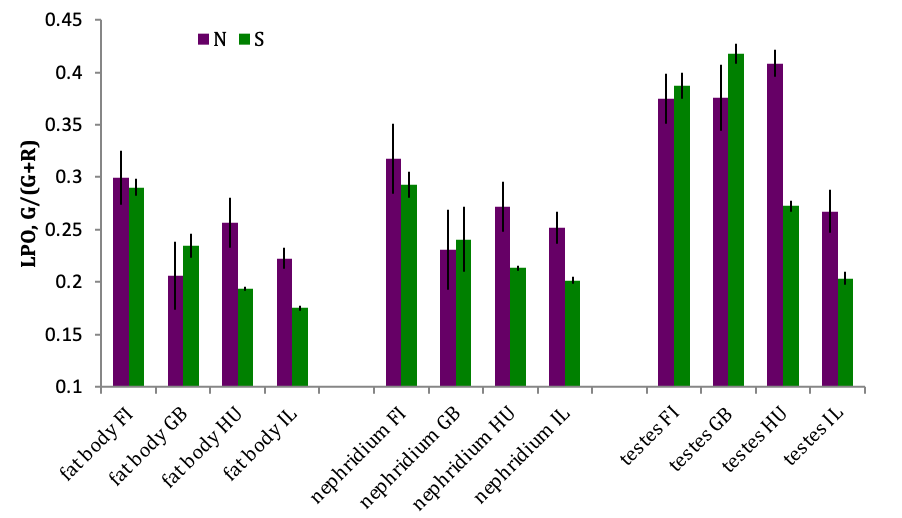

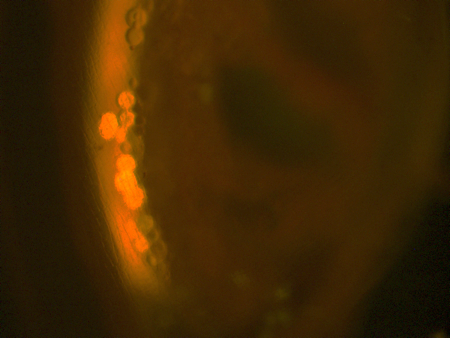


*g*

*t*

*fb*

Fig. S3. LPO in males. N – *Nannochloropsis* diet (purple); S – *Scenedesmus* diet (green). LPO measured as the ratio of green to green+red BODIPY C11 fluorescence. Inset shows the location of testes (t). Gut (g) labeled for a reference, not measured.


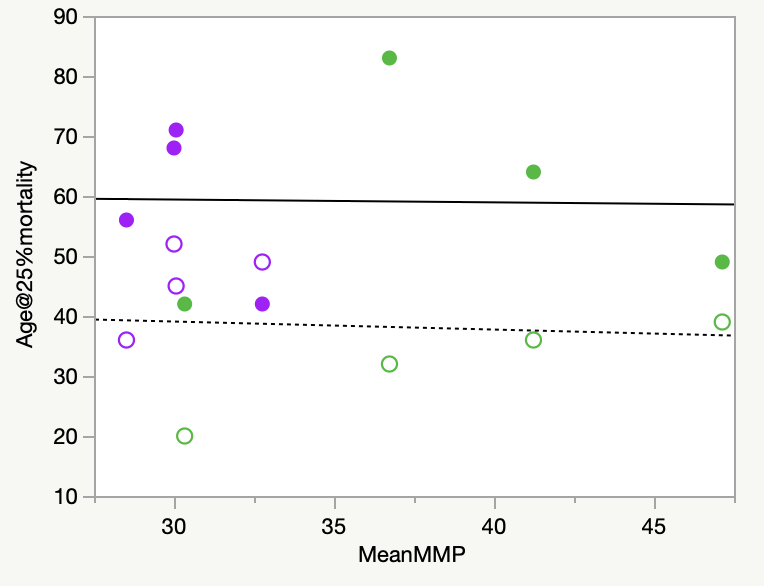

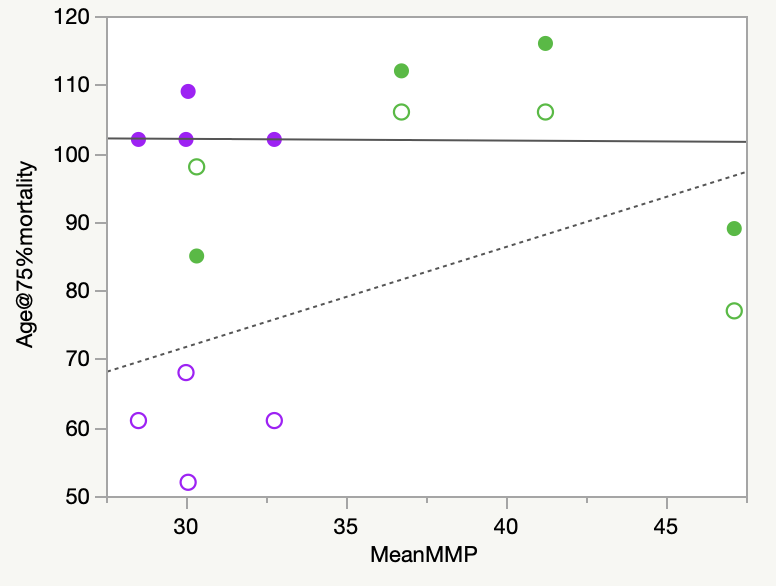


Fig. S4. No consistent effect of mitochondrial membrane potential, MMP, and lipid peroxidation, LPO, on age of 25 and 75 lifespan percentiles. Symbols as in Main text Fig. 6. Regression lines drawn separately for each food level; only P values <0.1 shown.
